# Supplementary figures and images for: Acute effects of breaking up prolonged sitting on fatigue and cognition: a pilot study
Source: PubMed Central journal article supplement — BMJ Open. 2016 Feb 26;6(2):e009630. doi: 10.1136/bmjopen-2015-009630 (PMC4769400; doi:10.1136/bmjopen-2015-009630), 2016-02-26

Supplemental Figure: Trial CONSORT diagram

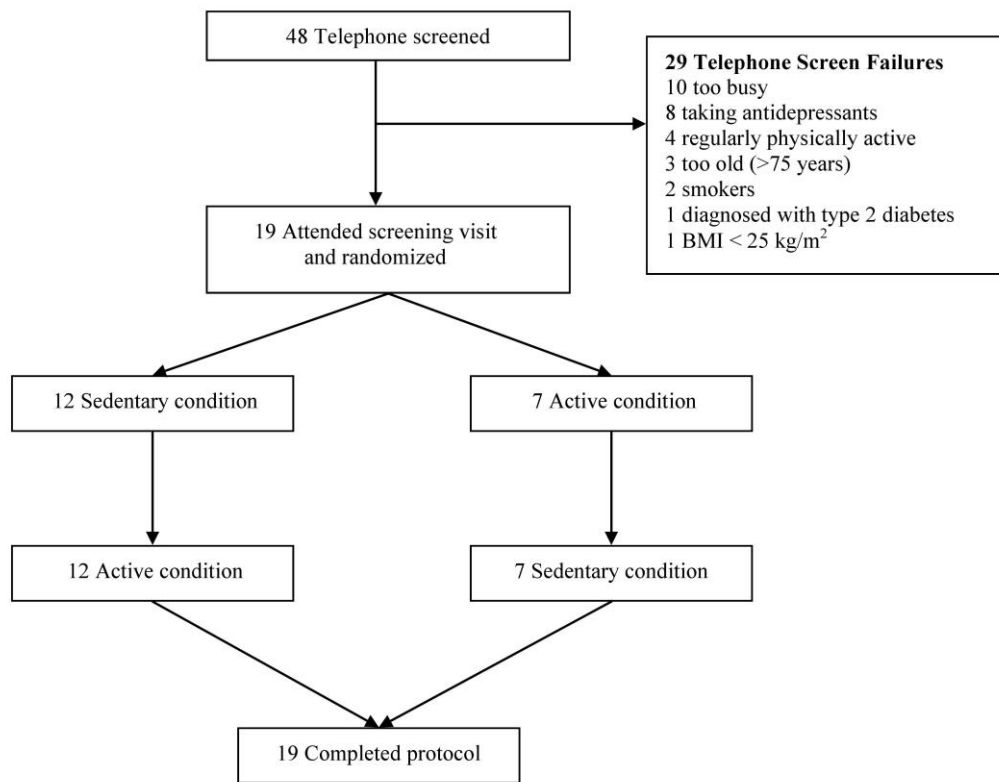

Supplement: bmjopen-2015-009630supp_figure.pdf [file bmjopen-2015-009630supp_figure.pdf]
